# Supplementary material for: Phenolic-Rich Extracts from Circular Economy: Chemical Profile and Activity against Filamentous Fungi and Dermatophytes
Source: MDPI journal article supplement (doi:10.3390/molecules28114374), 2023-05-26
Supplement: s1 [file s1]

## Supplementary Material

### Phenolic-Rich Extracts from Circular Economy: Chemical Profile and Activity against Filamentous Fungi and Dermatophytes

**Abstract.** Fungal infections represent a relevant issue in agri-food and biomedical fields because they could compromise quality of food and humans' health. Natural extracts represent a safe alternative to synthetic fungicides and in the green chemistry and circular economy scenario, agro-industrial wastes and by-products offer an eco-friendly source of bioactive natural compounds. In this paper, phenolic-rich extracts from *Olea europaea* L. de-oiled pomace, *Castanea sativa* Mill. wood, *Punica granatum* L. peel, *Vitis vinifera* L. pomace and seeds were characterized by HPLC-MS-DAD analysis. Finally, these extracts were tested as antimicrobial agents against pathogenic filamentous fungi and dermatophytes as *Aspergillus brasiliensis*, *Alternaria* sp., *Rhizopus stolonifer* and *Trichophyton interdigitale*. The experimental results evidenced that all extracts exhibited a significant growth inhibition for *Trichophyton interdigitale*. *Punica granatum* L., *Castanea sativa* Mill., and *Vitis vinifera* L. extracts showed a high activity against *Alternaria* sp. and *Rhizopus stolonifer*. These data resulted promising for the potentiality of applications of some of these extracts as antifungal agents for food and biomedical fields.

#### Figures and Tables

**Figure S1.** Chromatographic profile of OEP at 280 nm.

**Table S1.** Quali-quantitative analysis of OEP.

**Figure S2.** Chromatographic profile of CSW at 254 and 280 nm.

**Table S2.** Quali-quantitative analysis of CSW.

**Figure S3.** Chromatographic profile of PGP at 254 and 280 nm.

**Table S3.** Quali-quantitative analysis of PGP.

**Figure S4.** Chromatographic profile of VVP at 520 and 280 nm.

**Table S4.** Quali-quantitative analysis of VVP.

**Figure S5.** Chromatographic profile of VVS acquired at 280 nm.

**Table S5.** Quali-quantitative analysis of VVS.

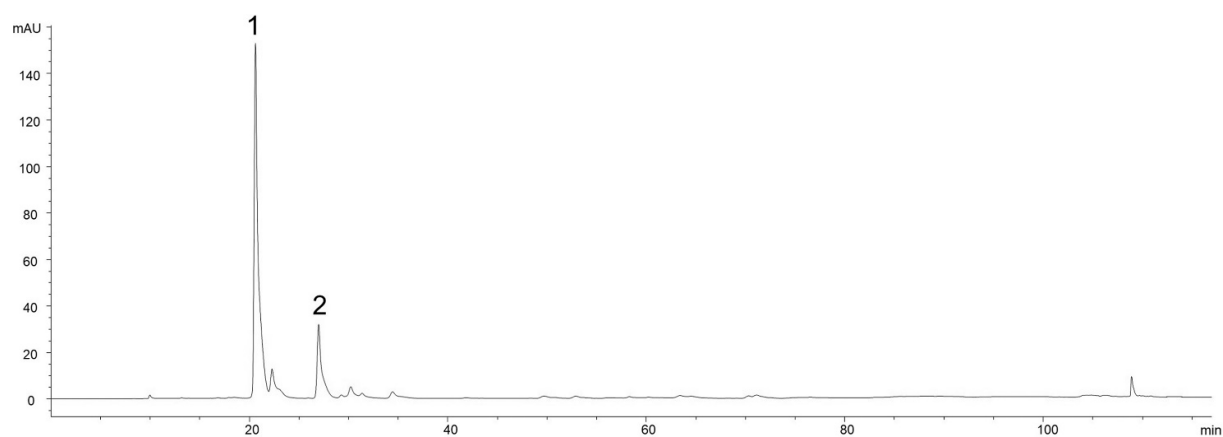

**Figure S1.** Chromatographic profile of OEP at 280 nm.

**Table S1.** Quali-quantitative analysis of OEP. The individual compounds are numbered as in **Figure S1**.

| Identification    | RT (min) | $\lambda_{\text{max}}$ (nm) | $[\text{M-H}]^-$ (m/z) | mg/g           |
|-------------------|----------|-----------------------------|------------------------|----------------|
| 1. Hydroxytyrosol | 20.6     | 280                         | 153                    | 138 $\pm$ 4.0  |
| 2. Tyrosol        | 27.0     | 276                         | 137                    | 35.0 $\pm$ 0.8 |
| Total polyphenols |          |                             |                        | 173 $\pm$ 5    |

Results are expressed as mg of each compound per g of extract. Retention times (RT), wavelengths of maximum UV absorbance ( $\lambda_{\text{max}}$ ) and the m/z values for the ESI-MS molecular ions after negative ionization of each compound are reported.

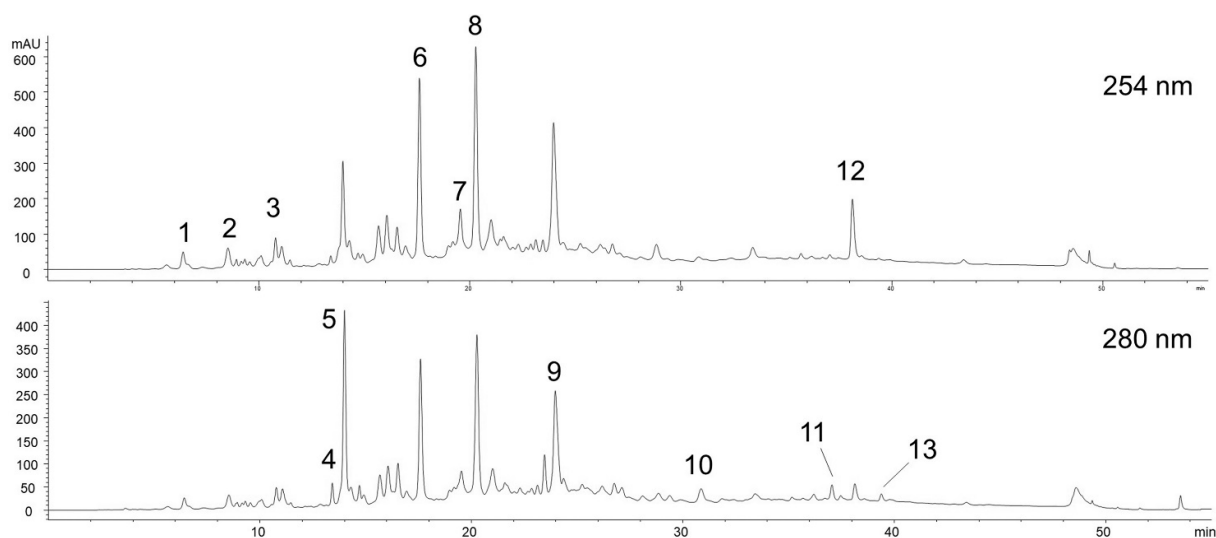

**Figure S2.** Chromatographic profile of CSW at 254 and 280 nm.

**Table S2.** Quali-quantitative analysis of CSW. The individual compounds are numbered as in **Figure S2**.

| Identification                      | RT (min) | $\lambda_{\max}$ (nm) | [M-H] <sup>-</sup> (m/z) | mg/g        |
|-------------------------------------|----------|-----------------------|--------------------------|-------------|
| 1. Vescalin                         | 6.9      | 246, 276sh            | 631                      | 9.3 ± 0.2   |
| 2. Castalin                         | 8.8      | 246, 280sh            | 631                      | 8.1 ± 0.2   |
| 3. Pedunculagin I                   | 11.5     | 258, 378sh            | 783                      | 10.0 ± 0.2  |
| 4. Monogalloyl glucose              | 14.1     | 274                   | 331                      | 3.81 ± 0.08 |
| 5. Gallic acid                      | 15.4     | 272                   | 169                      | 16.2 ± 0.3  |
| 6. Vescalagin                       | 18.4     | 245, 280 sh           | 933                      | 47.6 ± 0.5  |
| 7. Dehydrated tergallic-C-glucoside | 20.8     | 250, 374              | 613                      | 9.3 ± 0.2   |
| 8. Castalagin                       | 21.9     | 248, 280 sh           | 933                      | 97.7 ± 0.9  |
| 9. Digalloyl glucose                | 24.1     | 274                   | 483                      | 19.6 ± 0.2  |
| 10. Trigalloyl glucose              | 32.4     | 276                   | 635                      | 20.6 ± 0.2  |
| 11. Tetragalloyl glucose            | 38.0     | 276                   | 787                      | 7.7 ± 0.1   |
| 12. Ellagic acid                    | 39.6     | 254, 370              | 301                      | 6.1 ± 0.2   |
| 13. Pentagalloyl glucose            | 40.8     | 274                   | 939                      | 4.26 ± 0.08 |
| Total polyphenols                   |          |                       |                          | 260 ± 3     |

Results are expressed as mg of each compound per g of extract. Retention times (RT), wavelengths of maximum UV absorbance ( $\lambda_{\max}$ ) and the m/z values for the ESI-MS molecular ions after negative ionization of each compound are reported.

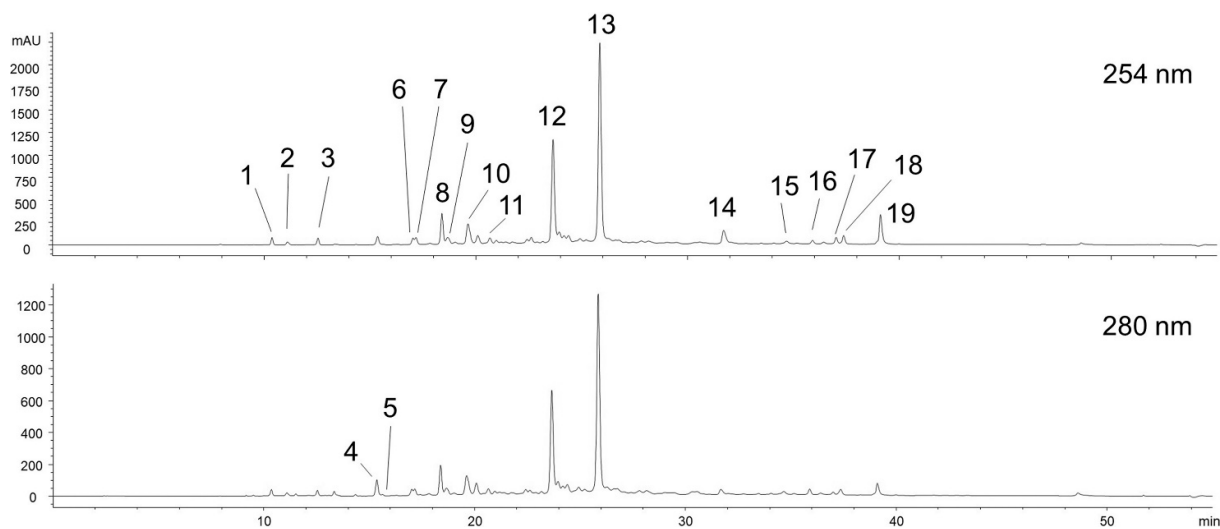

**Figure S3.** Chromatographic profile of PGP at 254 and 280 nm.

**Table S3.** Quali-quantitative analysis of PGP. The individual compounds are numbered as in **Figure S3**.

| Identification              | RT (min) | $\lambda_{\max}$ (nm) | [M-H] <sup>-</sup> (m/z) | mg/g          |
|-----------------------------|----------|-----------------------|--------------------------|---------------|
| 1. HHDP glucose 1           | 10.4     | slope                 | 481                      | 0.75 ± 0.01   |
| 2. HHDP glucose 2           | 11.1     | slope                 | 481                      | 0.437 ± 0.009 |
| 3. HHDP glucose 3           | 12.5     | slope                 | 481                      | 0.71 ± 0.01   |
| 4. Gallic acid              | 15.4     | 272                   | 169                      | 1.25 ± 0.02   |
| 5. Monogalloyl glucose      | 15.5     | 274                   | 331                      | 0.106 ± 0.005 |
| 6. $\alpha$ -Punicalin      | 17.0     | 258, 378              | 781                      | 1.25 ± 0.04   |
| 7. $\beta$ -Punicalin       | 17.2     | 258, 380              | 781                      | 1.32 ± 0.02   |
| 8. Punicalagin isomer 1     | 18.4     | 258, 378              | 1083                     | 6.90 ± 0.09   |
| 9. Pedunculagin I           | 18.7     | 258, 378sh            | 783                      | 1.16 ± 0.06   |
| 10. Punicalagin isomer 2    | 19.6     | 258, 378              | 1083                     | 6.91 ± 0.08   |
| 11. Pedunculagin III        | 21.0     | 260, 378              | 933                      | 0.69 ± 0.01   |
| 12. $\alpha$ -Punicalagin   | 23.7     | 258, 378              | 1083                     | 27.1 ± 0.3    |
| 13. $\beta$ -Punicalagin    | 25.9     | 258, 380              | 1083                     | 58.5 ± 0.6    |
| 14. Ellagic acid hexoside   | 31.7     | 254, 362              | 463                      | 2.10 ± 0.08   |
| 15. Vanoleic acid bilactone | 34.7     | 258, 366              | 469                      | 0.45 ± 0.01   |
| 16. Ellagitannin m/z 951    | 35.9     | 264, 364              | 951                      | 1.02 ± 0.02   |
| 17. Ellagic acid rhamnoside | 37.0     | 254, 360              | 447                      | 0.61 ± 0.03   |
| 18. Ellagic acid pentoside  | 37.4     | 254, 362              | 433                      | 0.87 ± 0.04   |
| 19. Ellagic acid            | 39.1     | 254, 368              | 301                      | 2.60 ± 0.08   |
| Total polyphenols           |          |                       |                          | 115 ± 2       |

Results are expressed as mg of each compound per g of extract. Retention times (RT), wavelengths of maximum UV absorbance ( $\lambda_{\max}$ ) and the m/z values for the ESI-MS molecular ions after negative ionization of each compound are reported.

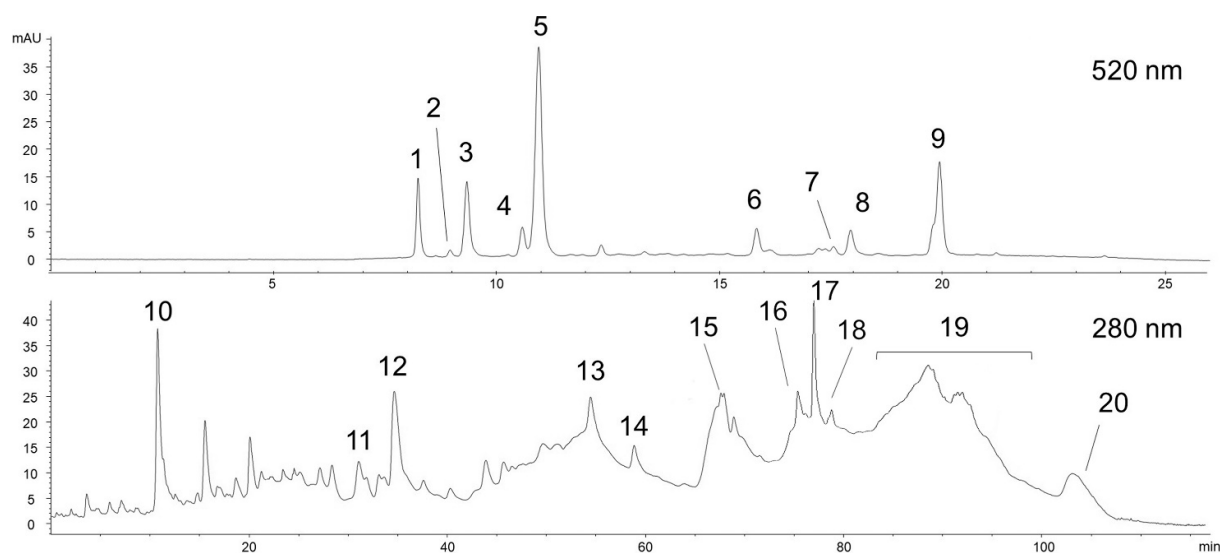

**Figure S4.** Chromatographic profile of VVP acquired at 520 and 280 nm.

**Table S4.** Quali-quantitative analysis of VVP. The individual compounds are numbered as in **Figure S4**.

| Identification                       | RT (min) | $\lambda_{\max}$ (nm) | [M+H] <sup>+</sup> (m/z) | mg/g            |
|--------------------------------------|----------|-----------------------|--------------------------|-----------------|
| 1. Delphinidin-3-glucoside           | 8.2      | 522                   | 465                      | 0.262 ± 0.007   |
| 2. Cyanidin-3-glucoside              | 9.0      | 514                   | 449                      | 0.0097 ± 0.0003 |
| 3. Petunidin-3-glucoside             | 9.3      | 524                   | 479                      | 0.365 ± 0.008   |
| 4. Peonidin-3-glucoside              | 10.6     | 518                   | 163                      | 0.089 ± 0.003   |
| 5. Malvidin-3-glucoside              | 11.0     | 526                   | 493                      | 1.30 ± 0.02     |
| 6. Delphinidin-3-coumaroyl glucoside | 15.8     | 530                   | 611                      | 0.130 ± 0.004   |
| 7. Cyanidin-3-acetyl glucoside       | 17.6     | 524                   | 491                      | 0.0100 ± 0.0005 |
| 8. Petunidin-3-coumaroyl glucoside   | 18.0     | 532                   | 625                      | 0.173 ± 0.005   |
| 9. Malvidin-3-coumaroyl glucoside    | 20.0     | 532                   | 639                      | 0.80 ± 0.02     |
| 10. Gallic acid                      | 16.0     | 272                   | 169 [M-H] <sup>-</sup>   | 2.37 ± 0.06     |
| 11. Procyanidin dimer B3             | 30.6     | 280                   | 579                      | 7.0 ± 0.2       |
| 12. Catechin                         | 33.9     | 280                   | 291                      | 0.414 ± 0.008   |
| 13. Procyanidin trimers              | 57.4     | 280                   | 867                      | 2.01 ± 0.05     |
| 14. Procyanidin dimer B6             | 59.0     | 280                   | 579                      | 2.85 ± 0.08     |
| 15. Procyanidin dimer B2             | 64.0     | 280                   | 579                      | 10.2 ± 0.3      |
| 16. Epicatechin                      | 76.5     | 280                   | 291                      | 0.320 ± 0.008   |
| 17. Procyanidin trimer               | 77.0     | 280                   | 867                      | 50 ± 2          |
| 18. Epicatechin gallate dimers       | 79.0     | 280                   | 883                      | 0.85 ± 0.02     |
| 19. Procyanidin tetramers            | 90.9     | 280                   | 1155                     | 293 ± 4         |
| 20. Epicatechin gallate dimers       | 104.4    | 280                   | 883                      | 53 ± 1          |
| Total polyphenols                    |          |                       |                          | 425 ± 8         |

Results are expressed as mg of each compound per g of extract. Retention times (RT), wavelengths of maximum UV absorbance ( $\lambda_{\max}$ ) and the m/z values for the ESI-MS molecular ions after positive or negative ionization of each compound are reported.

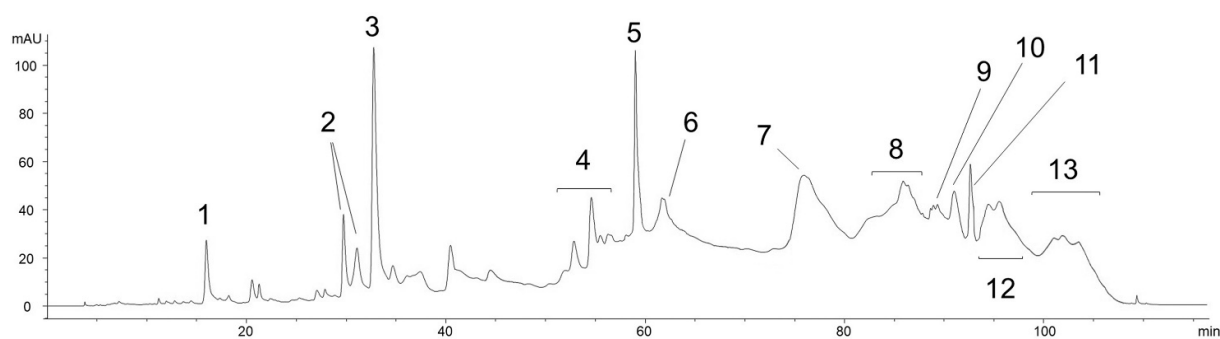

**Figure S5.** Chromatographic profile of VVS acquired at 280 nm.

**Table S5.** Quali-quantitative analysis of VVS. The individual compounds are numbered as in **Figure S5**.

| Identification                   | RT (min) | $\lambda_{\max}$ (nm) | $[M+H]^+$ (m/z) | mg/g            |
|----------------------------------|----------|-----------------------|-----------------|-----------------|
| 1. Gallic acid                   | 16.0     | 272                   | 169 $[M-H]^-$   | 1.50 $\pm$ 0.02 |
| 2. Procyanidin dimer B3          | 30.6     | 280                   | 579             | 26 $\pm$ 1      |
| 3. Catechin                      | 33.9     | 280                   | 291             | 45 $\pm$ 1      |
| 4. Procyanidin trimer            | 57.4     | 280                   | 867             | 8.8 $\pm$ 0.2   |
| 5. Procyanidin dimer B6          | 59.0     | 280                   | 579             | 11.2 $\pm$ 0.3  |
| 6. Procyanidin dimer B2          | 64.0     | 280                   | 579             | 13.6 $\pm$ 0.3  |
| 7. Epicatechin                   | 76.5     | 280                   | 291             | 30.3 $\pm$ 0.8  |
| 8. Procyanidin dimers gallate    | 88.3     | 280                   | 731             | 20.1 $\pm$ 0.5  |
| 9. Procyanidin trimers digallate | 89.7     | 280                   | 1171            | 315 $\pm$ 9     |
| 10. Procyanidin tetramers (I)    | 90.0     | 280                   | 1155            | 54.7 $\pm$ 0.16 |
| 11. Epicatechin gallate          | 92.2     | 280                   | 443             | 6.24 $\pm$ 0.08 |
| 12. Procyanidin tetramers (II)   | 95.0     | 280                   | 1155            | 11.6 $\pm$ 0.5  |
| 13. Procyanidin dimers digallate | 98.5     | 280                   | 883             | 142 $\pm$ 5     |
| Total polyphenols                |          |                       |                 | 686 $\pm$ 20    |

Results are expressed as mg of each compound per g of extract. Retention times (RT), wavelengths of maximum UV absorbance ( $\lambda_{\max}$ ) and the m/z values for the ESI-MS molecular ions after positive or negative ionization of each compound are reported.
